# Supplementary material
Source: PubMed Central journal article supplement (PMC2277055)
Supplement: tjp0584-0089-SD1.pdf [file tjp0584-0089-SD1.pdf]

## SUPPLEMENTAL INFORMATION

### Supplemental Methods

#### Cell-surface biotinylation assay

HEK 293 cells transfected with GluR $\delta$ 2<sup>Lc</sup>, GluR $\delta$ 2<sup>Lc</sup>-V/R, or a *hotfoot-4J* mutant (GluR $\delta$ 2<sup>ho</sup>) were treated with a membrane-impermeable biotinylation reagent (EZ-link sulfo-NHS-LC-Biotin; Pierce, Rockford, IL) as described previously (Matsuda & Yuzaki, 2002). Subsequently, cells were solubilized in 500  $\mu$ l TNE buffer (50 mM NaF, 10 % NP-40, 20 mM EDTA, 1  $\mu$ M pepstatin A, 2  $\mu$ g/ml leupeptin, 10  $\mu$ g/ml aprotinin, 0.1 % SDS, 50 mM Tris-HCl, pH 8.0) and immunoprecipitated using streptavidin-coupled beads (Amersham Pharmacia, Piscataway, NJ) and immunoblotted with anti-GluR $\delta$ 2 antibody (Chemicon, Temecula, CA).

#### Electrophysiology

Parasagittal slices (200- $\mu$ m thick) were prepared from cerebella infected with recombinant Sindbis viruses, and whole-cell patch-clamp recordings were performed using Purkinje cells that emitted nYFP fluorescence. The resistances of the patch pipettes were 3–5 M $\Omega$  when filled with an internal solution composed of (in mM): 65 Cs-methanesulfonate, 65 K-gluconate, 20 HEPES, 10 KCl, 1 MgCl<sub>2</sub>, 4 Na<sub>2</sub>ATP, 1 Na<sub>2</sub>GTP, 5 sucrose and 0.4 EGTA (pH 7.25, 295 mOsm/kg). The solution used for slice storage and recording consisted of the following (in mM): 125 NaCl, 2.5 KCl, 2 CaCl<sub>2</sub>, 1 MgCl<sub>2</sub>, 1.25 NaH<sub>2</sub>PO<sub>4</sub>, 26 NaHCO<sub>3</sub> and 10 D-glucose, bubbled continuously with a mixture of 95% O<sub>2</sub> and 5% CO<sub>2</sub> at room temperature. Picrotoxin (100  $\mu$ M,

Sigma, St. Louis, MO, USA) was always present in the saline to block inhibitory synaptic transmission. For the recording of PF-evoked excitatory postsynaptic currents (PF-EPSCs), square pulses (50  $\mu$ s, 20–100  $\mu$ A) were applied to the PFs through a stimulating glass pipette placed on the molecular layer (~50  $\mu$ m away from the pial surface).

In the LTD sessions, PF-EPSCs were recorded successively at a frequency of 0.1 Hz from Purkinje cells clamped at –80 mV. After a stable PF-EPSC amplitude had been observed for at least 10 min, a conjunctive stimulation that consisted of 30 single PF stimuli together with a 200-ms depolarizing pulse from a holding potential of –60 to +20 mV was applied for the LTD induction. Access resistances were monitored every 10 s by measuring the peak currents in response to hyperpolarizing steps (50 ms, 2 mV) throughout the experiments; the measurements were discarded if the resistance changed by more than 20% of its original value. Signals were filtered at 1 kHz and digitized at 4 kHz.

## Supplemental Figure

### Supplemental Figure 1. Cell surface expression of GluR $\delta$ <sup>Lc</sup> and GluR $\delta$ <sup>Lc</sup>-V/R.

Cells transfected with GluR $\delta$ <sup>Lc</sup> or GluR $\delta$ <sup>Lc</sup>-V/R were treated with a membrane-impermeable biotinylation reagent. A *hotfoot-4J* mutant (GluR $\delta$ <sup>ho</sup>) known to be retained in the endoplasmic reticulum (Matsuda & Yuzaki, 2002) was used as a negative control. Solubilized membranes were precipitated using streptavidin-coupled beads and immunoblotted with anti-GluR $\delta$  antibody. A, Representative results of six independent experiments. Cell lysate fractions (Input), which corresponded to 1% of total lysates, and biotinylated fractions (Biotin), which were precipitated by

streptavidin-coupled beads and corresponded to 18.8% of total lysates, were compared. *B*, A quantitative analysis of the ratio of surface GluR $\delta$ 2 expression. Band intensities of GluR $\delta$ 2 in the surface biotinylated fractions were normalized by those in the total lysates. The surface expression ratio of GluR $\delta$ 2<sup>Lc</sup> was arbitrarily established as 100%. Error bars indicate the SEM. \*\* $P < 0.01$ ; \* $P < 0.05$ ; n.s., no significant.

### **Reference**

Matsuda S & Yuzaki M. (2002). Mutation in *hotfoot-4J* mice results in retention of  $\delta$ 2 glutamate receptors in ER. *Eur J Neurosci* **16**, 1507-1516.

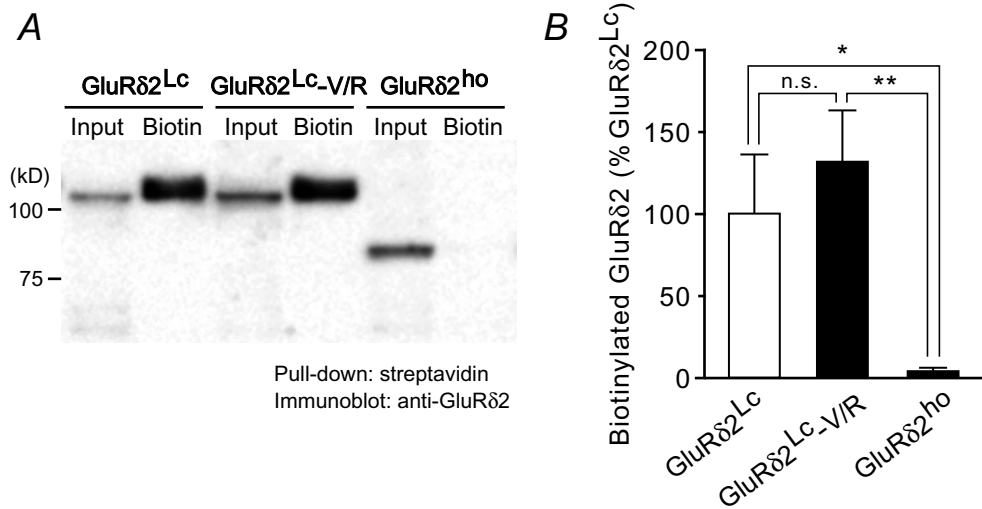

**Fig. S1** (Kakegawa et al.)
